# Supplementary material
Source: PubMed Central journal article supplement (PMC10461795)
Supplement: NIHMS1916702-supplement-Supplementary1.pdf [file NIHMS1916702-supplement-Supplementary1.pdf]

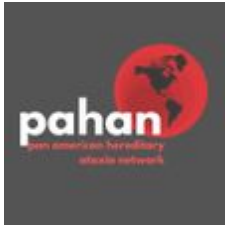

# PAHAN survey on the care for ataxics in the Americas and the Caribbean

From the Pan-American Hereditary Ataxia Network

**This survey is an initiative of PAHAN (<https://pan-american-hereditary-ataxia-network-pahan7.webnode.com/>). We are sending it to health professionals who care for ataxics in American countries, especially from Latin America. Our goals are to help define (1) the approximate number of ataxics already identified in our countries, (2) the access that our populations have to diagnostic, genetic counseling, pre-symptomatic testing and rehabilitation facilities related to inherited ataxias, and their cost coverage; (3) if there are any health policies set for identification and prevention, diagnosis and early intervention; (4) the availability of training courses (residency, fellowships, etc) in HA for health professionals; and (5) how is the support to local clinical and experimental research on hereditary ataxias. With this, we intend to approach all professionals involved with these conditions in our countries, so that together we can prepare a general diagnostic framework and a set of recommendations on how to improve the care of hereditary ataxia in our communities. Please feel free to choose the questions below. You will see that none are mandatory and that there are different types of questions, so you can choose the ones that are easier to be answered, according to your context. We are very grateful for your time and your participation in this poll.**

Laura

Bannach Jardim, UFRGS, Brazil; Christopher Gomez, University of Chicago, USA; Jonathan Javier Magaña Aguirre, INRLGI, Mexico; Roberto Rodríguez-Labrada, CIRAH, Cuba; Sheng-Han Kuo, University of Columbia, USA; José Luiz Pedroso, UNIFESP, Brazil; Juan Fernandez Ruiz, UNAM, Mexico; Luis Velázquez-Pérez, Cuban Academy of Sciences, Cuba, and PAHAN chair

**Nome**

First name          Surname (last name)

## **E-mail**

exemplo@exemplo.com

## **Professional address (institution or private clinic)**

first line: name of the institution, if suitable

second line: street address

Cidade                          País

ZIP code

## **Phone Number (Country, Province, Number)**

## **WhatsApp (if you wish to be included)**

for a whatsapp group

**Do you want to become a provisional member of PAHAN? As soon as possible, we will hold a debate on the topic.**

Sim

Not yet

## You are

- a neurologist
- a clinical geneticist
- other doctor (physician)
- a genetic counselor
- a professional in the laboratory diagnosis of inherited ataxias
- a rehabilitation professional
- a nurse
- a social worker
- outrio

## Your answers to this survey will tell about your experience

- in a public service (public health system). You will be the only respondent about your service
- in a public service (public health system). It is possible that other colleagues of mine will respond to this survey based on our common experience.
- in your private clinic (including health insurance patients). You will be the only respondent about your clinics
- in your private clinic (including health insurance patients). It is possible that other colleagues of mine will respond to this survey based on our common experience.

## How many cases of ataxia are in your current care?

Number of individuals      Number of families

SCAs (autosomal dominant cerebellar ataxias)

Isolated/sporadic ataxic cases, or clearly autosomal recessive ataxias

non-genetic ataxias

## Can you better define your current cases?

Number of individuals

Number of families

SCA1

SCA2

SCA3/MJD

SCA6

SCA7

SCA8

SCA10

SCA12

SCA17

DRPLA

SCA21

SCA36

Friedreich ataxia

**Ataxia-telangiectasia**

AOA1

AOA2

AOA3

AOA4

ARSACS

CANVAS

**Another hereditary ataxia?**

**The above data are**

approximated values

exact values, obtained from a local survey

**How many cases of ataxia you followed throughout your clinical practice, in the last 20 or less years?**

Number of individuals    Number of families

SCAs (autosomal dominant cerebellar ataxias)

isolated/sporadic ataxic cases, or clearly autosomal

recessive ataxias

non-genetic ataxias

## The above data are

approximated values

exact values, obtained from a local survey

## Can you better define the ataxia cases you followed throughout your clinical practice?

Number of individuals

Number of families

SCA1

SCA2

SCA3/MJD

SCA6

SCA7

SCA8

SCA10

SCA12

SCA17

DRPLA

SCA21

SCA36

Friedreich ataxia

Ataxia-telangiectasia

AOA1

AOA2

AOA3

AOA4

ARSACS

CANVAS

## Another hereditary ataxia?

### You and your patients have access to

| Directly available in public service | Available in public service only under court order (judicialization) | Available in the private sector (health insurance included) | We do not have access to it |
|--------------------------------------|----------------------------------------------------------------------|-------------------------------------------------------------|-----------------------------|
|--------------------------------------|----------------------------------------------------------------------|-------------------------------------------------------------|-----------------------------|

Panels for expanded repeat ataxias

Panels for ataxias (point mutations, frameshift, etc)

NGS panel for ataxias

Exome sequencing

Genome sequencing

### Check what additional assessments or exams you have available to include in the diagnostic work up for ataxia

| Directly available in public service | Available in public service only under court order (judicialization) | Available in the private sector (health insurance included) | We do not have access to it. |
|--------------------------------------|----------------------------------------------------------------------|-------------------------------------------------------------|------------------------------|
|--------------------------------------|----------------------------------------------------------------------|-------------------------------------------------------------|------------------------------|

Brain MRI

Spinal cord MRI

CT Scan

Peripheral conduction studies (electroneuromyography)

Evoked potentials

Vitamin E in plasma

Alpha-fetoprotein

Optical coherence tomography (OCT)

**Conventional ophthalmic  
evaluation - with  
fundoscopy and slit lamp**

**Evaluation of peripheral  
smear by hematologist  
(acanthocytes)**

**Abdominal imaging**

**Lysosomal enzymes in  
leukocytes and plasma**

**Ceruloplasmin**

**Copper, 24h urine**

**Amino acids in blood or  
urine**

**Organic acids in urine**

**TSH**

**B12**

**anti-HIV**

**anti-HTLV1**

**Jejunum biopsy (for  
Whipple)**

**Anti-transglutaminase IgA**

**Quitotriosidase**

**Oxysterols**

**Filipin in fibroblasts'  
culture**

**Do you or your workgroup have access to a clinical protocol for ataxias with therapeutic guidelines?**

Yes, we follow an evidence-based protocol built after public consultation by the country's health authority.

Yes, we follow a protocol built by our local institution

Não

**After diagnosis, do the patient and her/his family have access to genetic counseling sessions?**

Não

**After the diagnosis of the index case, do other family members have access to pre-symptomatic tests?**

Sim

Não

**The genetic counseling sessions are performed**

in the public health system

in private clinics

**The genetic counseling sessions are performed**

by a multidisciplinary team

by the same doctor who take care of diagnosis

**Do you want to comment about the above issues?**

**What rehabilitation services are available for ataxics in your community?**

Public Health System   private health clinics   We do not have access to it

physical therapy

speech therapy

occupational therapy

**How do you rate the availability of the following care for your ataxic patients:**

**Adequate**   Limited by scarcity of professionals or structure   **Unavailable**

Clinical diagnosis and follow-up visits

Laboratory work up

Genetic Counseling

Physical therapy



Speech therapy

Occupational therapy

**What molecular studies are performed in your laboratory/institution?**

**Funded by the public  
health system**

**Private service (including  
health insurance)**

**No available in our  
institution**

SCA1

SCA2

SCA3/MJD

SCA6

SCA7

SCA8

SCA10

SCA12

SCA17

DRPLA

FRDA

ATM

AOA1

AOA2

AOA3

AOA4

ARSACS

CANVAS

NGS panel

Exome  
sequencing

Genome  
sequencing

**Another molecular analysis?**

**Do you supervise students in research activities related to ataxia projects?**

**The state pays for the student's education**

**The student pays for their education**

**undergraduate students**

**MSc students**

**PhD students**

**Post-doc students**

**Please check if you are conducting research project(s) on the following subjects related to hereditary ataxias**

**Clinical studies (on human data), with public funding**

**Clinical studies, sponsored by corporations/private companies**

**Experimental studies in cells or other models, with public funding**

**Experimental studies in cells or other models, sponsored by corporations/private companies**

**SCA1**

**SCA2**

**SCA3/MJD**

**SCA6**

**SCA7**

**SCA8**

**SCA10**

**Other SCAs**

**Friedreich ataxia**

**Ataxia-telangiectasia or any AOA**

**ARSACS**

CANVAS

Other

**Another subject under your research lines related to ataxia?**

**In your opinion, what must be improved in your state or country for the care of ataxic people?  
Number from 1 to 10 in order of priority. You need more and better:**

Priority

Doctors

GC professionals

Rehabilitation professionals

Molecular tests

MRI

Clinical protocols and therapeutic guidelines

Physical infrastructure for clinical care

Physical infrastructure for rehabilitation

Funding for local scientific research

Professional training

**We intend to present the results of this survey to all participants by email, and also to health authorities in each region. If the results are robust, they might result in scientific communications as well. We thank you again for your participation.**
